# Supplementary material for: Hospitalization and mortality in patients with COVID-19 with or at risk of type 2 diabetes: data from five health systems in Pennsylvania and Maryland
Source: PubMed Central journal article supplement — BMJ Open Diabetes Res Care. 2022 Jun 9;10(3):e002774. doi: 10.1136/bmjdrc-2022-002774 (PMC9184995; doi:10.1136/bmjdrc-2022-002774), 2022-06-09
Supplement: bmjdrc-2022-002774supp001.pdf [file bmjdrc-2022-002774supp001.pdf]

Supplemental Table 1. Patient characteristics by race/ethnicity in patients with type 2 diabetes or at risk of diabetes

|                                 | Type 2 Diabetes * (n=4,662)  |                              |                  | At-Risk of Type 2 Diabetes ** (n=10,222) |                              |                   |
|---------------------------------|------------------------------|------------------------------|------------------|------------------------------------------|------------------------------|-------------------|
|                                 | White, Non-Hispanic (n=2573) | Black, Non-Hispanic (n=1425) | Hispanic (n=664) | White, Non-Hispanic (n=6865)             | Black, Non-Hispanic (n=2265) | Hispanic (n=1092) |
| Age, year                       | 65.4 (13.9)                  | 48.8 (12.9)                  | 59.7 (13.9)      | 54.9 (17.7)                              | 48.8 (15.5)                  | 46.5 (15.5)       |
| Age group, %                    |                              |                              |                  |                                          |                              |                   |
| <65                             | 46.6                         | 68.8                         | 64.0             | 70.7                                     | 84.8                         | 86.5              |
| >=65                            | 53.4                         | 31.2                         | 36.0             | 29.4                                     | 15.2                         | 13.5              |
| Sex, %                          |                              |                              |                  |                                          |                              |                   |
| Men                             | 50.8                         | 38.0                         | 47.1             | 41.6                                     | 29.8                         | 31.1              |
| Women                           | 49.2                         | 62.0                         | 52.9             | 58.4                                     | 70.2                         | 68.9              |
| Smoking, %                      |                              |                              |                  |                                          |                              |                   |
| Current                         | 5.6                          | 5.5                          | 1.5              | 6.2                                      | 5.4                          | 3.5               |
| Former                          | 27.2                         | 13.5                         | 6.5              | 20.4                                     | 12.2                         | 7.1               |
| Never                           | 38.0                         | 26.7                         | 21.4             | 42.1                                     | 39.0                         | 38.5              |
| Unknown                         | 29.2                         | 54.3                         | 70.6             | 31.4                                     | 43.4                         | 50.9              |
| Location                        |                              |                              |                  |                                          |                              |                   |
| Urban                           | 90.0                         | 99.4                         | 99.4             | 93.5                                     | 99.7                         | 99.7              |
| Rural                           | 3.5                          | 0.1                          | 0.2              | 3.9                                      | 0.0                          | 0.1               |
| Unknown                         | 6.5                          | 0.5                          | 0.4              | 2.7                                      | 0.3                          | 0.2               |
| Comorbidity, %                  |                              |                              |                  |                                          |                              |                   |
| MI                              | 13.8                         | 11.3                         | 13.4             | 3.7                                      | 2.3                          | 2.8               |
| Congestive heart failure        | 25.9                         | 24.8                         | 21.5             | 8.2                                      | 7.4                          | 4.9               |
| Peripheral vascular disease     | 21.5                         | 17.2                         | 17.6             | 7.7                                      | 4.4                          | 4.2               |
| Cerebrovascular disease         | 19.5                         | 15.9                         | 16.7             | 8.5                                      | 5.9                          | 5.0               |
| Chronic pulmonary disease       | 33.0                         | 34.5                         | 38.7             | 23.7                                     | 27.6                         | 24.3              |
| Liver disease, mild             | 15.4                         | 13.1                         | 18.5             | 7.5                                      | 6.8                          | 9.3               |
| Renal disease, mild to moderate | 32.8                         | 25.5                         | 25.3             | 9.0                                      | 7.8                          | 4.3               |
| Any malignancy                  | 12.6                         | 9.3                          | 7.8              | 10.0                                     | 7.1                          | 5.3               |
| Renal disease, severe           | 5.8                          | 11.4                         | 9.5              | 0.9                                      | 2.6                          | 1.2               |
| CCI Score                       | 5.8 (3.1)                    | 5.0 (3.1)                    | 5.1 (3.2)        | 2.4 (2.5)                                | 2.2 (1.7)                    | 1.9 (1.4)         |

|                                    | Type 2 Diabetes * (n=4,662)  |                              |                  | At-Risk of Type 2 Diabetes ** (n=10,222) |                              |                   |
|------------------------------------|------------------------------|------------------------------|------------------|------------------------------------------|------------------------------|-------------------|
|                                    | White, Non-Hispanic (n=2573) | Black, Non-Hispanic (n=1425) | Hispanic (n=664) | White, Non-Hispanic (n=6865)             | Black, Non-Hispanic (n=2265) | Hispanic (n=1092) |
| Body Mass Index, kg/m <sup>2</sup> | 34.5 (7.9)                   | 34.8 (8.8)                   | 33.3 (7.5)       | 32.0 (7.0)                               | 33.9 (7.8)                   | 32.0 (6.5)        |
| BMI category, %                    |                              |                              |                  |                                          |                              |                   |
| <18.5                              | 0.4                          | 0.6                          | 0.2              | 0.2                                      | 0.2                          | 0.1               |
| 18.5 to <25                        | 7.4                          | 9.3                          | 9.6              | 9.1                                      | 6.6                          | 7.9               |
| 25-29.9                            | 21.4                         | 20.9                         | 24.0             | 34.9                                     | 26.8                         | 33.3              |
| 30-39.9                            | 47.6                         | 43.9                         | 46.5             | 41.4                                     | 44.4                         | 45.2              |
| 40+                                | 21.7                         | 24.0                         | 16.4             | 12.0                                     | 19.4                         | 10.8              |
| Unknown                            | 1.5                          | 1.3                          | 3.3              | 2.4                                      | 2.6                          | 2.7               |
| SBP, mmHg <sup>1</sup>             | 130.8 (17.1)                 | 135.2 (18.6)                 | 132.9 (19.7)     | 126.6 (15.9)                             | 129.3 (17.3)                 | 123.7 (16.0)      |
| DBP, mmHg <sup>2</sup>             | 74.5 (10.9)                  | 78.7 (11.2)                  | 77.0 (11.3)      | 76.4 (10.3)                              | 78.9 (11.0)                  | 75.5 (10.4)       |
| HDL chol, mg/dL <sup>3</sup>       | 44.4 (12.6)                  | 50.0 (16.1)                  | 44.6 (13.7)      | 52.5 (15.1)                              | 55.5 (16.5)                  | 49                |
| LDL chol, mg/dL <sup>4</sup>       | 132.0 (47.0)                 | 139.1 (46.7)                 | 145.6 (49.9)     | 151.2 (41.4)                             | 143.8 (41.5)                 | 153.7 (41.7)      |
| Time of COVID diagnosis, %         |                              |                              |                  |                                          |                              |                   |
| March-June, 2020                   | 19.1                         | 40.8                         | 41.6             | 18.1                                     | 36.3                         | 41.8              |
| July-Oct, 2020                     | 25.0                         | 25.0                         | 22.4             | 26.3                                     | 29.4                         | 23.4              |
| Nov-Jan, 2021                      | 55.9                         | 34.2                         | 36.0             | 55.6                                     | 34.3                         | 34.8              |
| HbA1c categories, %                |                              |                              |                  |                                          |                              |                   |
| < 6.0%                             | 11.4                         | 12.0                         | 6.9              |                                          |                              |                   |
| 6.0-6.9%                           | 25.3                         | 21.5                         | 21.5             |                                          |                              |                   |
| 7.0-7.9%                           | 18.0                         | 13.8                         | 16.4             |                                          |                              |                   |
| 8.0-8.9%                           | 8.6                          | 9.1                          | 8.3              |                                          |                              |                   |
| ≥ 9.0%                             | 11.5                         | 15.9                         | 17.5             |                                          |                              |                   |
| Missing                            | 25.1                         | 27.7                         | 29.4             |                                          |                              |                   |
| HbA1c, mean (SD), % <sup>5</sup>   | 7.4 (1.7)                    | 7.8 (2.2)                    | 7.9 (2.0)        |                                          |                              |                   |
| Any sulfonylureas, %               | 18.4                         | 15.7                         | 14.5             |                                          |                              |                   |
| Any metformin, %                   | 37.0                         | 48.1                         | 44.7             |                                          |                              |                   |
| Any Insulin, %                     | 34.0                         | 41.1                         | 46.2             |                                          |                              |                   |
| Any DPP-4 inhibitor,%              | 10.5                         | 10.9                         | 11.0             |                                          |                              |                   |
| Any GLP-1 agonist, %               | 4.5                          | 5.0                          | 3.8              |                                          |                              |                   |
| Any SGLT2 inhibitor, %             | 9.8                          | 8.6                          | 11.0             |                                          |                              |                   |

Abbreviations: CCI: Charlson Comorbidity Index; BMI: Body Mass Index; SBP: systolic blood pressure; DBP: diastolic blood pressure; HDL: High-Density Lipoprotein; LDL: Low-Density Lipoprotein; HbA1c: Hemoglobin A1c; DPP-4 inhibitor: Dipeptidyl peptidase-4 inhibitor; GLP-1 agonist: Glucagon-like peptide-1 receptor agonist; SGLT-2: Sodium-glucose transport protein 2 (SGLT2) inhibitors

Data presented as mean (standard deviation) or percent

<sup>1</sup>SBP n=14,627; <sup>2</sup>DBP n=14,626; <sup>3</sup>HDL n=7,880, <sup>4</sup>LDL n=7,872, <sup>5</sup>HbA1c n=3,427

\* All p values <0.05 except congestive

Supplemental Table 2. Adjusted odds ratios (95% confidence intervals) for hospitalization only and severe outcomes in patients with type 2 diabetes or at risk of type 2 diabetes: Subgroup analysis

| Factors            | Type 2 Diabetes          |                          | At-Risk of Diabetes#     |                          |
|--------------------|--------------------------|--------------------------|--------------------------|--------------------------|
|                    | Hospitalization only     | ICU/Intubation /Death    | Hospitalization only     | ICU/Intubation /Death    |
| Total              |                          |                          |                          |                          |
| Black vs. White    | 1.08 (0.89, 1.32)        | <b>0.68 (0.52, 0.89)</b> | <b>1.54 (1.31, 1.80)</b> | <b>0.52 (0.38, 0.73)</b> |
| Hispanic vs. white | <b>1.73 (1.36, 2.19)</b> | 1.10 (0.78, 1.55)        | <b>1.77 (1.43, 2.18)</b> | 0.70 (0.45, 1.09)        |
| Age <65            |                          |                          |                          |                          |
| Black vs. White    | 1.01 (0.77, 1.32)        | <b>0.61 (0.41, 0.91)</b> | <b>1.55 (1.29, 1.87)</b> | 0.74 (0.48, 1.15)        |
| Hispanic vs. white | <b>1.60 (1.16, 2.20)</b> | 1.14 (0.70, 1.86)        | <b>1.66 (1.30, 2.11)</b> | 1.15 (0.68, 1.94)        |
| Age >=65           |                          |                          |                          |                          |
| Black vs. White    | 1.25 (0.93, 1.69)        | 0.82 (0.56, 1.20)        | <b>1.50 (1.10, 2.04)</b> | 0.90 (0.56, 1.43)        |
| Hispanic vs. White | <b>2.08 (1.43, 3.01)</b> | 1.13 (0.68, 1.87)        | <b>2.49 (1.58, 3.91)</b> | 1.59 (0.76, 3.29)        |
| Men                |                          |                          |                          |                          |
| Black vs. White    | 1.23 (0.92, 1.64)        | 0.78 (0.52, 1.18)        | <b>1.53 (1.17, 2.00)</b> | 1.00 (0.63, 1.56)        |
| Hispanic vs. White | <b>1.58 (1.11, 2.24)</b> | 1.48 (0.92, 2.40)        | <b>1.72 (1.21, 2.46)</b> | 1.58 (0.89, 2.82)        |
| Women              |                          |                          |                          |                          |
| Black vs. White    | 1.01 (0.78, 1.32)        | <b>0.58 (0.41, 0.84)</b> | <b>1.50 (1.23, 1.83)</b> | 0.66 (0.42, 1.04)        |
| Hispanic vs. White | <b>1.93 (1.39, 2.68)</b> | 0.78 (0.47, 1.30)        | <b>1.76 (1.36, 2.29)</b> | 0.94 (0.51, 1.74)        |
| Mar-Jun 2020       |                          |                          |                          |                          |
| Black vs. White    | <b>1.55 (1.09, 2.19)</b> | <b>0.64 (0.43, 0.96)</b> | <b>1.41 (1.08, 1.84)</b> | 0.55 (0.33, 0.92)        |
| Hispanic vs. White | <b>2.43 (1.63, 3.65)</b> | 0.78 (0.46, 1.33)        | <b>1.47 (1.05, 2.04)</b> | 1.10 (0.62, 1.98)        |
| July-Oct 2020      |                          |                          |                          |                          |
| Black vs. White    | 1.33 (0.91, 1.93)        | 0.73 (0.39, 1.36)        | <b>1.86 (1.41, 2.46)</b> | 1.38 (0.71, 2.68)        |
| Hispanic vs. White | <b>2.16 (1.32, 3.53)</b> | <b>2.85 (1.38, 5.88)</b> | <b>3.30 (2.29, 4.75)</b> | 2.07 (0.77, 5.57)        |
| Nov 2020-Feb 2021  |                          |                          |                          |                          |
| Black vs. White    | <b>0.70 (0.49, 0.99)</b> | 0.70 (0.44, 1.10)        | <b>1.46 (1.09, 1.95)</b> | 0.90 (0.54, 1.50)        |
| Hispanic vs. White | 1.33 (0.86, 2.04)        | 1.12 (0.61, 2.05)        | 1.14 (0.72, 1.79)        | 0.92 (0.41, 2.07)        |

ICU: Intensive Care Unit

#At risk defined based on elevated BMI, prediabetes diagnosis, or elevated HbA1c.

Adjusted for age, sex, smoking status, CCI score, time of COVID diagnosis, BMI category, SBP (quartile), DBP (quartile), HDL level (quartile), LDL level (quartile). Additional adjustments for HbA1c level, insulin use, metformin use, DPP-4 inhibitor use, GLP-1R agonist use, and SGLT2 inhibitor use in the analyses of type 2 diabetes patients.
