# Supplementary figures and images for: Hospitalization and mortality in patients with COVID-19 with or at risk of type 2 diabetes: data from five health systems in Pennsylvania and Maryland
Source: PubMed Central journal article supplement — BMJ Open Diabetes Res Care. 2022 Jun 9;10(3):e002774. doi: 10.1136/bmjdrc-2022-002774 (PMC9184995; doi:10.1136/bmjdrc-2022-002774), 2022-06-09

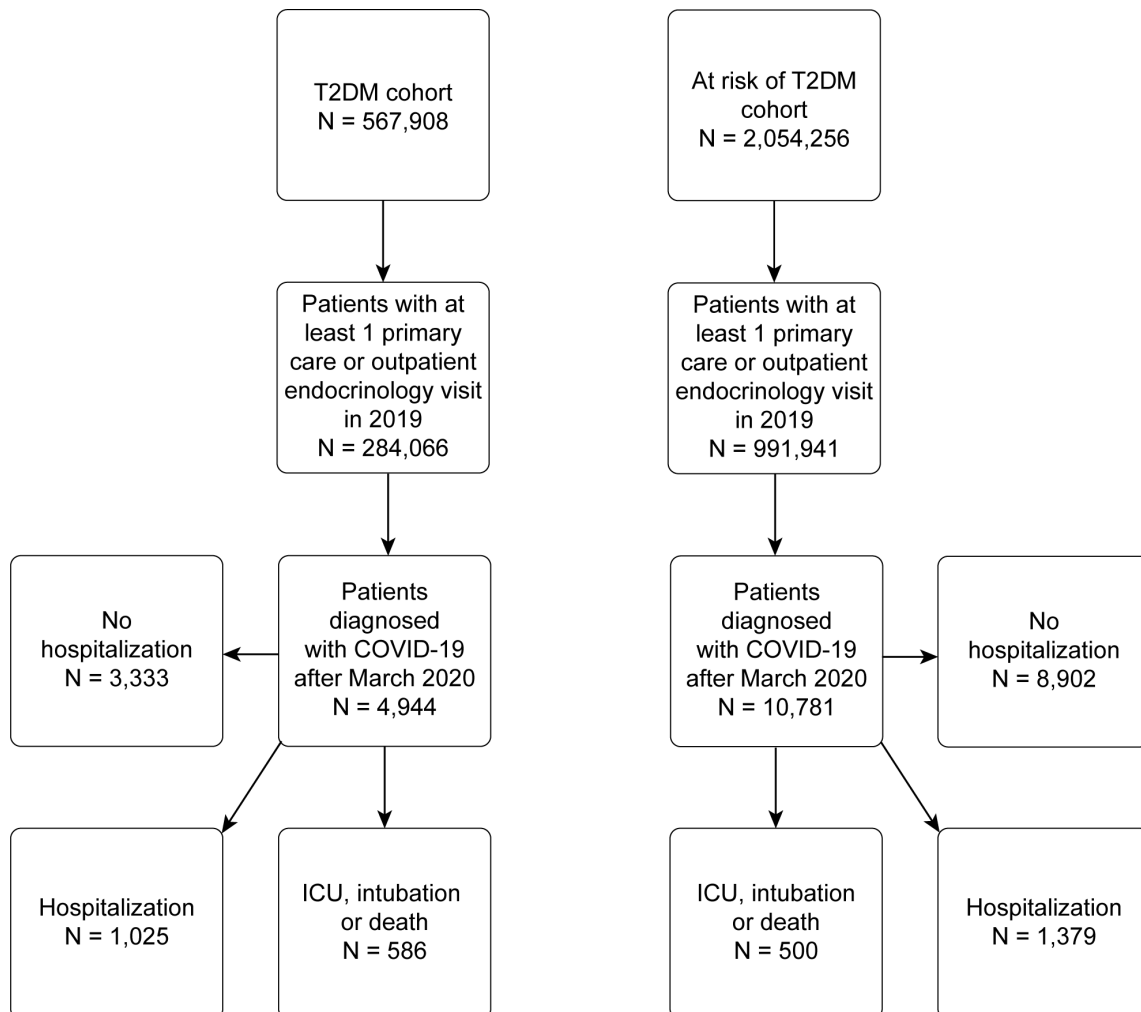

Supplement: bmjdrc-2022-002774supp002.pdf [file bmjdrc-2022-002774supp002.pdf]
